# Supplementary material for: Blue-light-activated phototropin2 trafficking from the cytoplasm to Golgi/post-Golgi vesicles
Source: PubMed Central journal article supplement (PMC4071840; doi:10.1093/jxb/eru172), 2014-05-12
Supplement: supp_eru172_jexbot117341_file001.pdf [file supp_eru172_jexbot117341_file001.pdf]

## Supplemental file

Figure S1: Anti-Atphot2 antibody specificity.

Total protein fraction was isolated from leaves of *Arabidopsis thaliana* (WT) and *Nicotiana benthamiana* and subjected to western blotting using Atphot2 antibody. Phot2 protein band is visible only in Arabidopsis. Plants were either dark-adapted for 12 h or kept under white light in growth chambers for 3 h before the protein extraction. 100 µg protein sample was loaded in each lane.

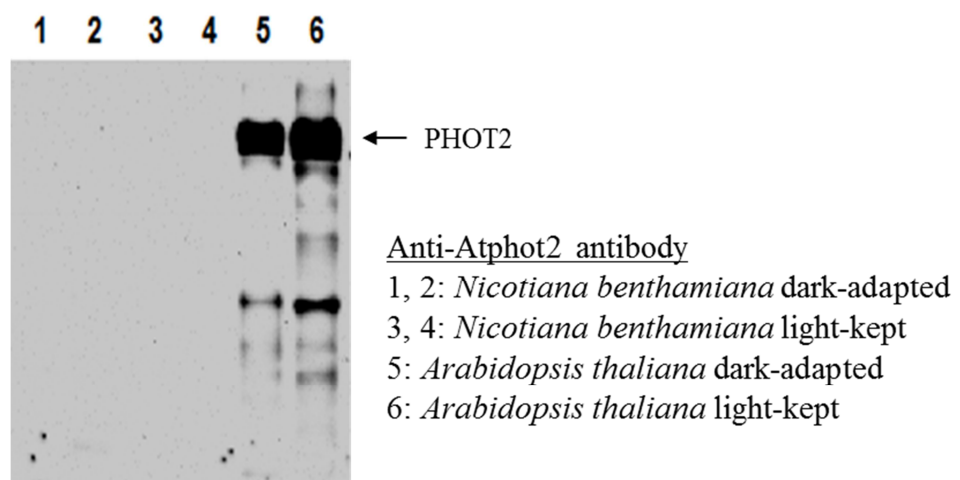

Figure S2: 35S-GFP-phot2 transiently expressed in *N. benthamiana* epidermal cells. Arrows are showing clumping of phot2 in the cytoplasm.

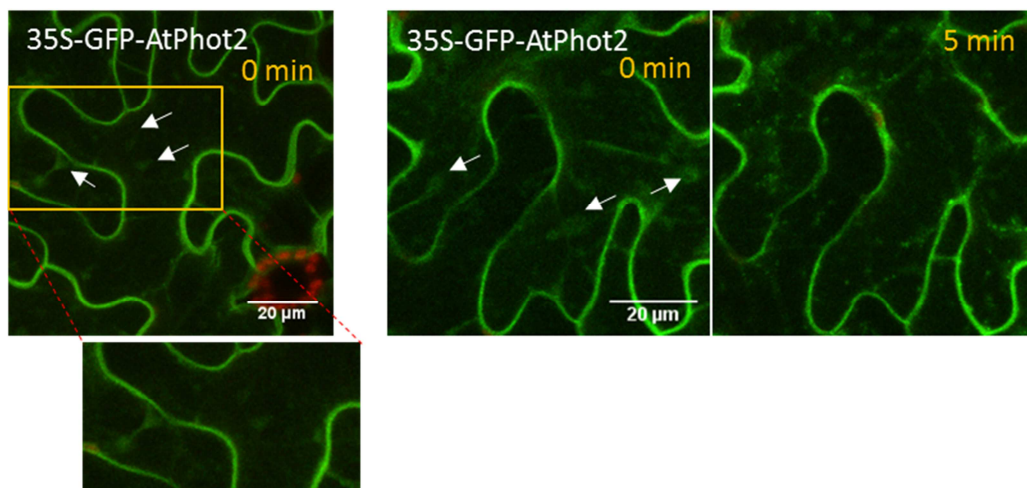

**Figure S3:** Plasma membrane fluorescence intensity before and after blue-light irradiation.

The corrected total fluorescence is calculated by subtracting the background fluorescence.

Ten different cells were examined in each case.

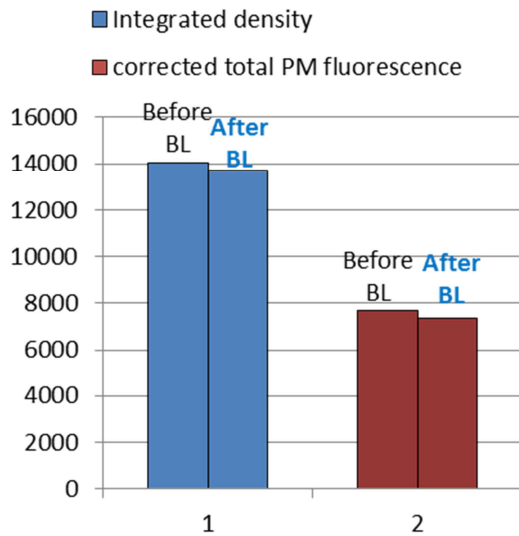

**Figure S4:** Manders coefficient for co-localization studies (calculated using ImageJ plugin JACop).

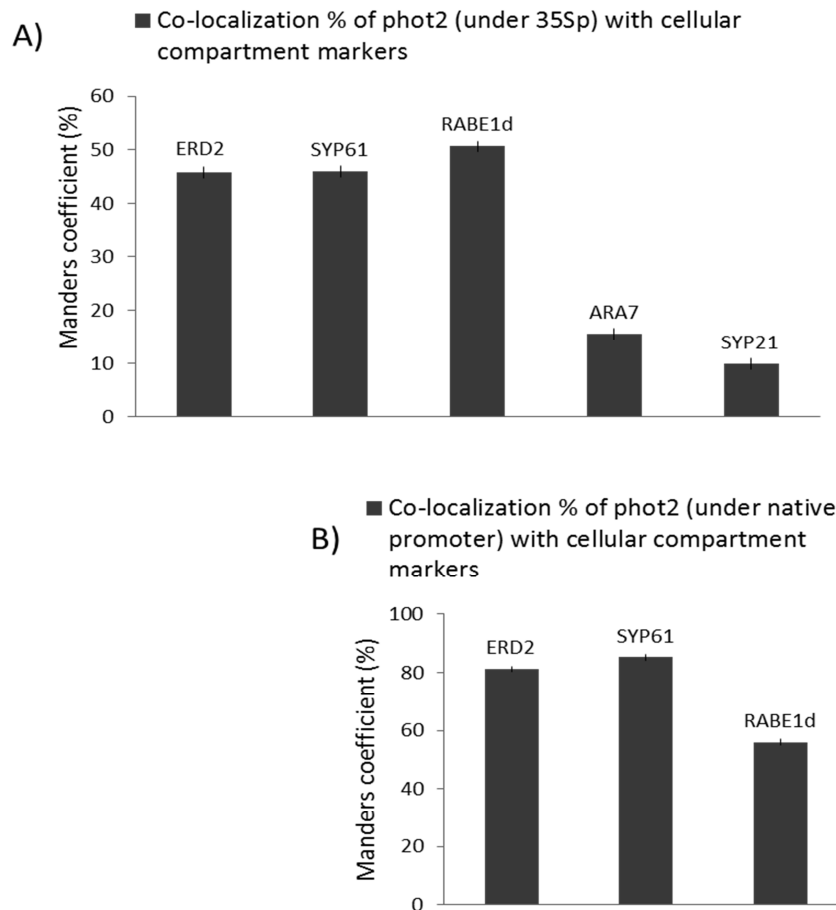

Figure S5: Controls of BiFC technique.

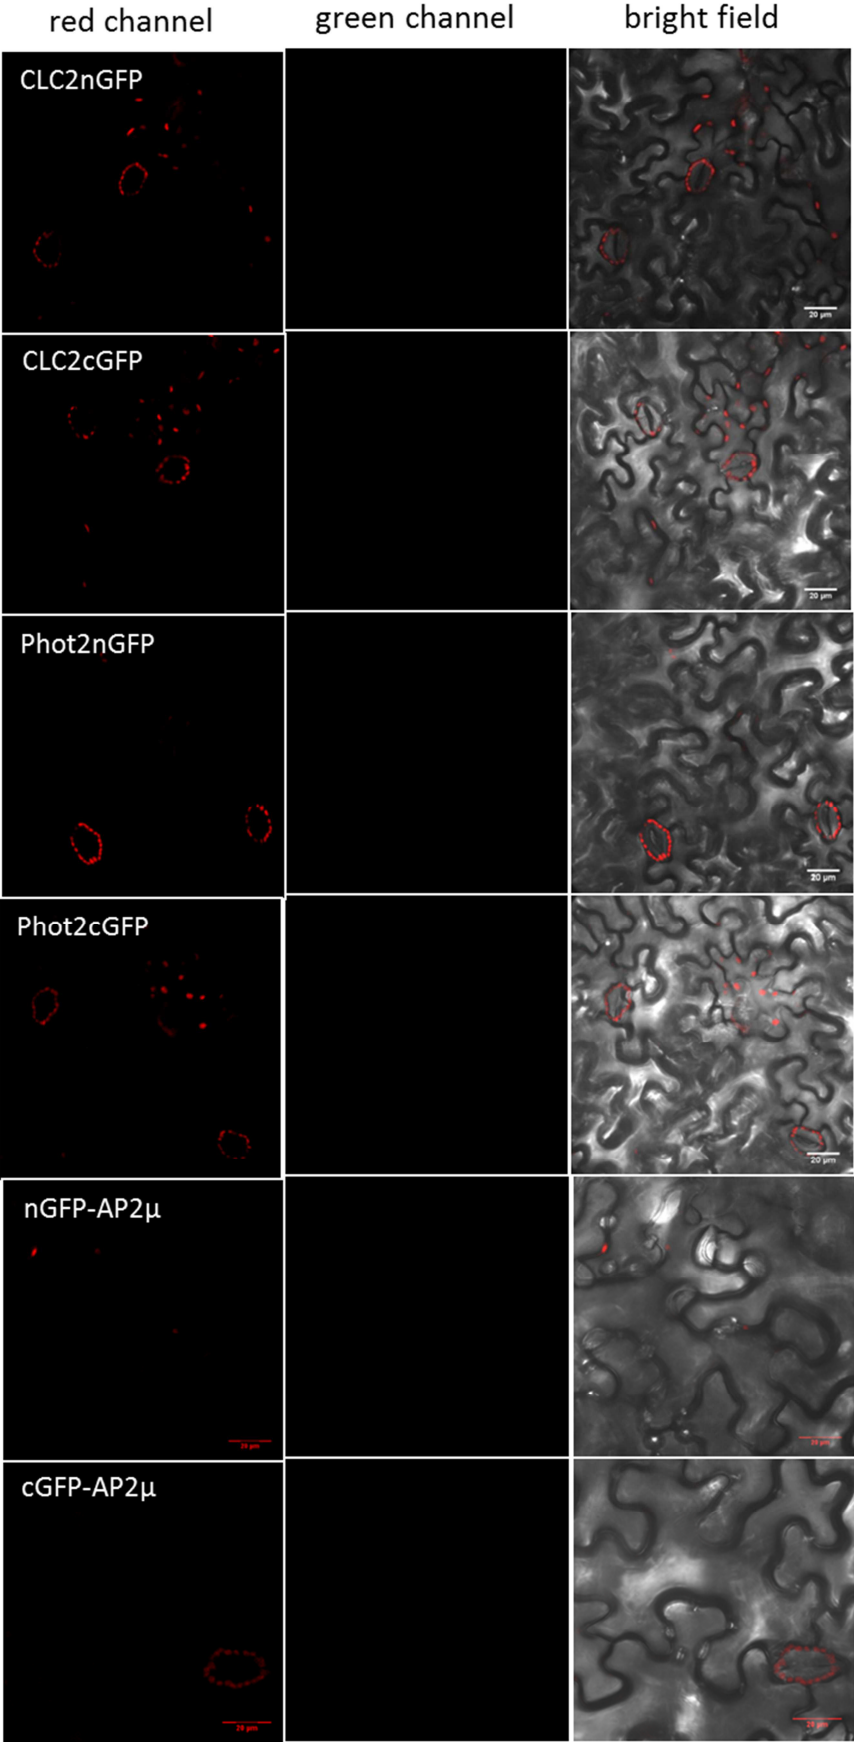

**Table S1: Plasmids and primers used in the study**

| PLASMIDS  |                                                                                                                               |
|-----------|-------------------------------------------------------------------------------------------------------------------------------|
| pK7FWG2   | Gateway destination vector for expression of the gene under 35S promoter with C-terminal GFP fusion                           |
| pK7WGF2   | Gateway destination vector for expression of the gene under 35S promoter with N-terminal GFP fusion                           |
| pH7m34GW  | Gateway destination vector for expression of the gene under 35S promoter with N-terminal part of GFP at C-terminal of protein |
| pK7m34GW  | Gateway destination vector for expression of the gene under 35S promoter with C-terminal part of GFP at C-terminal of protein |
| pK7m24GW2 | Gateway destination vector for expression of the gene under 35S promoter with C-terminal part of GFP at N-terminal of protein |
| pH7m24GW2 | Gateway destination vector for expression of the gene under 35S promoter with N-terminal part of GFP at N-terminal of protein |
| pMDC7     | Gateway destination vector for expression of the gene under $\beta$ -estradiol inducible promoter.                            |

| GATEWAY TECHNOLOGY (PRIMERS)        |                                                           |
|-------------------------------------|-----------------------------------------------------------|
| ARA7FPg                             | GGGGACAAGTTTGTACAAAAAAGCAGGCTCCATGTTGAGCAAGGGCGAGG        |
| ARA7RPg                             | GGGGACCACTTTGTACAAGAAAGCTGGGTCCCTAAGCACACAAGATGAGCTC      |
| CLC2FPg                             | GGGGACAAGTTTGTACAAAAAAGCAGGCTCCATGTCTGCCTTTGAAGACGATTC    |
| CLC2RPg                             | GGGGACCACTTTGTACAAGAAAGCTGGGTCAGCAGCAGTAACTGCCTCAG        |
| ERD2FPg                             | GGGGACAAGTTTGTACAAAAAAGCAGGCTCCATGAATATCTTTAGATTGCTGGCG   |
| ERD2RPg                             | CATACCTCCACCTCCACCAGCCGGAAGCTTAAGTTTGG                    |
| mCherryCFPg                         | GGTGGAGGTGGAGGTATGGTGAGCAAGGGCGAG                         |
| mCherryCRPg                         | GGGGACCACTTTGTACAAGAAAGCTGGGTCCCTACTTGTACAGCTCGTCCATG     |
| mCherryNFPg                         | GGGGACAAGTTTGTACAAAAAAGCAGGCTCCATGGTGAGCAAGGGCGAG         |
| mCherryNRPg                         | CTTACCTCCACCTCCACCCTTGTACAGCTCGTCCATG                     |
| Phot2FPg                            | GGGGACAAGTTTGTACAAAAAAGCAGGCTCCATGGAGAGGCCAAGAGCCC        |
| Phot2RPg                            | GGGGACCACTTTGTACAAGAAAGCTGGGTCTGAGAGGTCAATGTCCAAGTCC      |
| GPhot2FPg                           | GGGGACAAGTTTGTACAAAAAAGCAGGCTCCATGGAGAGGCCAAGAGCCC        |
| GPhot2RPg                           | GGGGACCACTTTGTACAAGAAAGCTGGGTCTGAGGTCAATGTCCAAGTCC        |
| Phot2stopRPg                        | GGGGACCACTTTGTACAAGAAAGCTGGGTCTTAGAAGAGGTCAATGTCCAAGTCC   |
| Phot2CheckFP                        | CCATTCCTCTACTCTCTACG                                      |
| Phot2CheckRP                        | CAATCAATAGCACTTGTATGACCAG                                 |
| RABE1dFPg                           | GGGGACAAGTTTGTACAAAAAAGCAGGCTCCATGGCGGTTGCGCCGG           |
| RABE1dRPg                           | GGGGACCACTTTGTACAAGAAAGCTGGGTCCCTAACGTAACCTACAGCAAGCTG    |
| SYP21FPg                            | GGTGGAGGTATGAGTTTCCAAGATCTCGAAGC                          |
| SYP21RPg                            | GGGGACCACTTTGTACAAGAAAGCTGGGTCTTAGACCAAGACAACGATGATGAC    |
| SYP61FPg                            | GGTGGAGGTATGCTTCAGCTCAAGATCCATTC                          |
| SYP61RPg                            | GGGGACCACTTTGTACAAGAAAGCTGGGTCTTAGGTCAAGAAGACAAGAACGAATAG |
| SITE DIRECTED MUTAGENESIS (PRIMERS) |                                                           |
| Phot2D720NFP                        | GGACACATAGTATTGGCTAACTTTG                                 |
| Phot2D720NRP                        | CAAAGTTAGCCAATACTATGTGTCC                                 |

Movie S1: Blue-light-induced phot2 translocation and movement of phot2-labeled punctuate structures in *N. benthamiana* epidermal cell. Two z-scans per minute were performed for a total of 15 min. Images were scanned at a thickness of 1  $\mu\text{m}$ . (Attached avi file)
